# Supplementary material for: Measuring the impact of gene prediction on gene loss estimates in Eukaryotes by quantifying falsely inferred absences
Source: PubMed Central journal article supplement (PMC6736253; doi:10.1371/journal.pcbi.1007301), 2019-08-28

Median: 16.88    Median: 0.94    Median: 5.80    Median: 34.29  
N: 35            N: 35            N: 35            N: 21

**Percentages**

100  
75  
50  
25

-  % Species-specific found
-  % Clade-specific found
-  % Total found
-  % BUSCO found

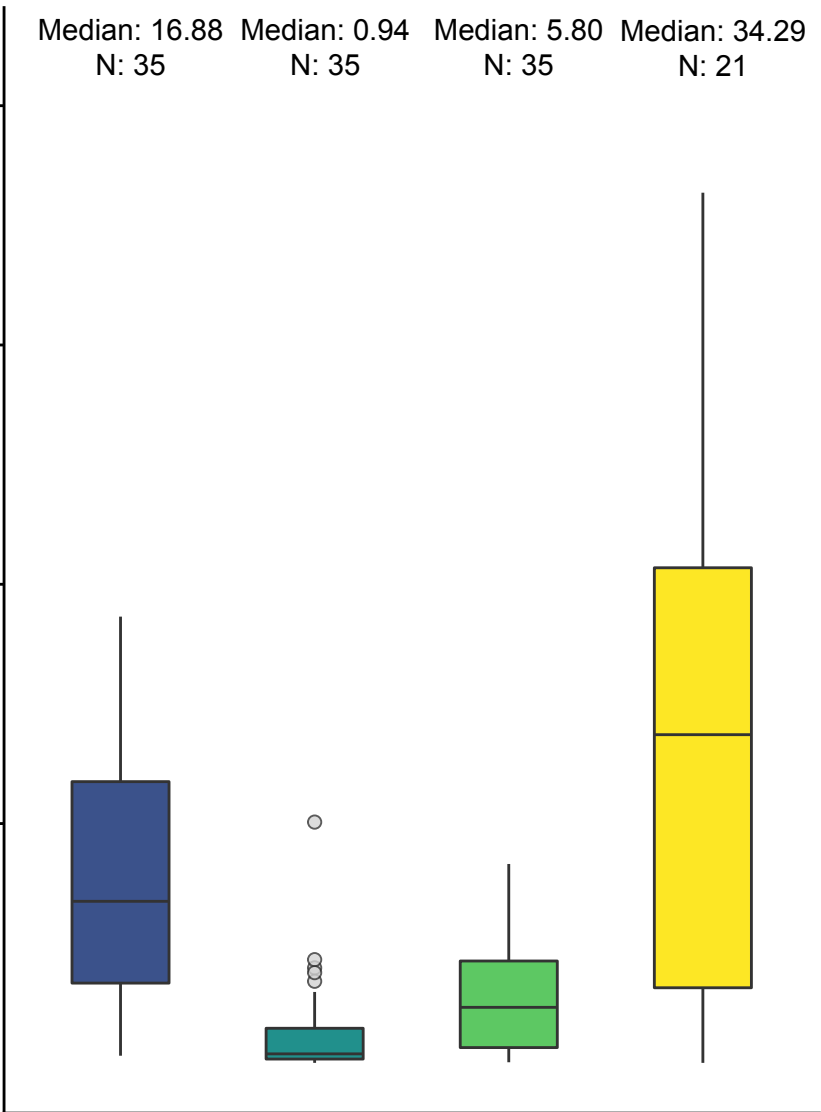

Supplement: pcbi.1007301.s005.pdf [file pcbi.1007301.s005.pdf]
