# Supplementary material for: Measuring the impact of gene prediction on gene loss estimates in Eukaryotes by quantifying falsely inferred absences
Source: PubMed Central journal article supplement (PMC6736253; doi:10.1371/journal.pcbi.1007301), 2019-08-28
Supplement: pcbi.1007301.s006.pdf [file pcbi.1007301.s006.pdf]

### % Species-specific found

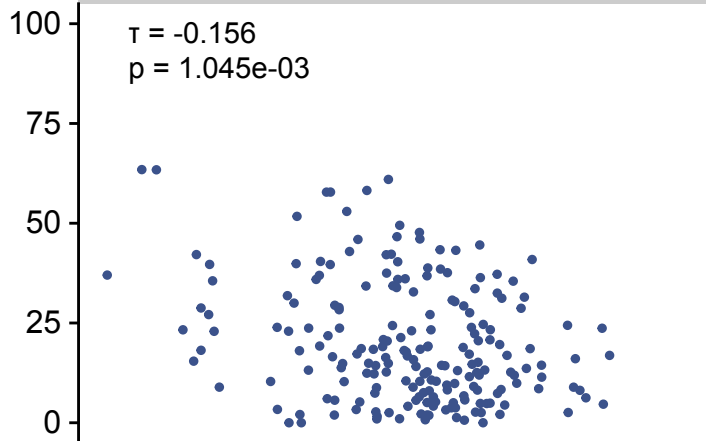

### % Clade-specific found

$\tau = -0.157$   
 $p = 9.935e-04$

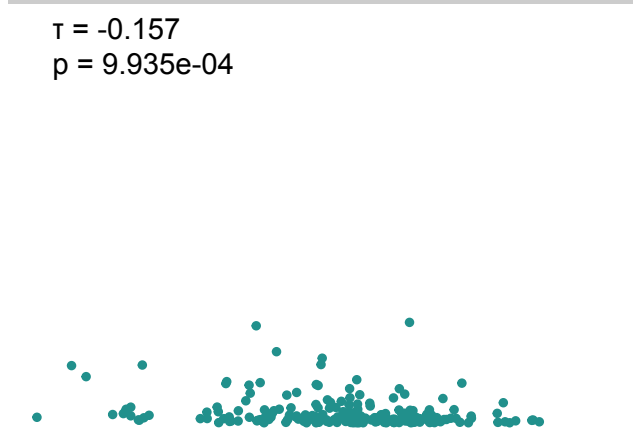

### % Total found

$\tau = -0.199$   
 $p = 3.112e-05$

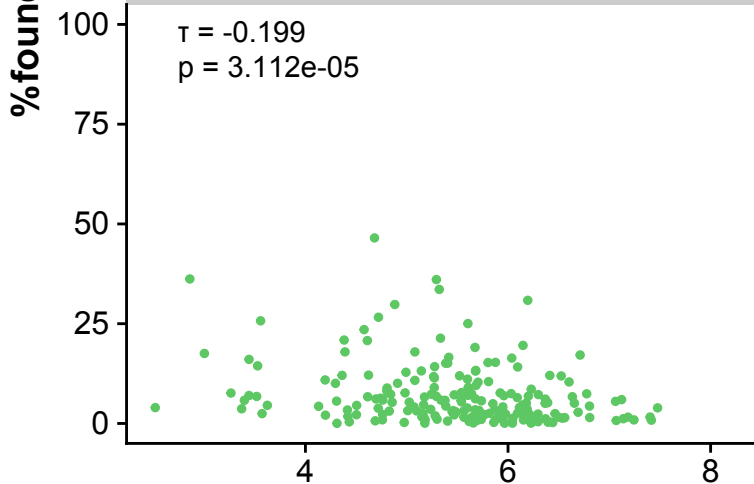

### % BUSCO found

$\tau = -0.089$   
 $p = 1.040e-01$

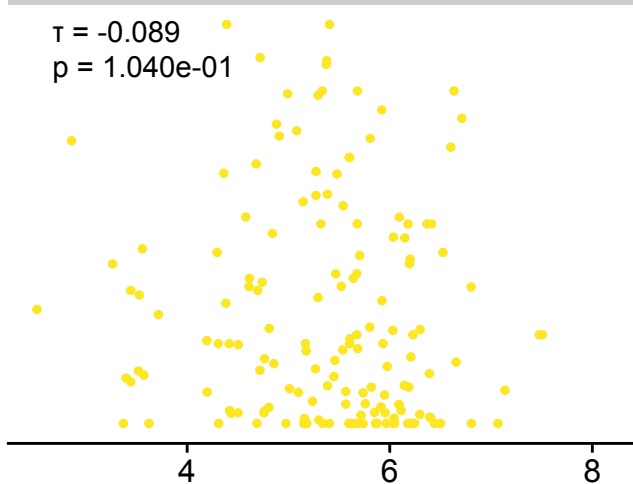

$\log_{10}(\text{N50})$
