# Supplementary material for: Measuring the impact of gene prediction on gene loss estimates in Eukaryotes by quantifying falsely inferred absences
Source: PubMed Central journal article supplement (PMC6736253; doi:10.1371/journal.pcbi.1007301), 2019-08-28

Length of Pfam domain

146 71 145 71 145 70.5 ← **Medians**

2000

1500

1000

500

0

- Species-specific absences
- Clade-specific absences
- Total absences

Found between:  
0-12 times, N = 4082

Found between:  
13-39 times, N = 100

Found between:  
0-7 times, N = 4082

Found between:  
7-39 times, N = 100

Found between:  
0-17 times, N = 4082

Found between:  
17-71 times, N = 100

\*\*\*

\*\*\*

\*\*\*

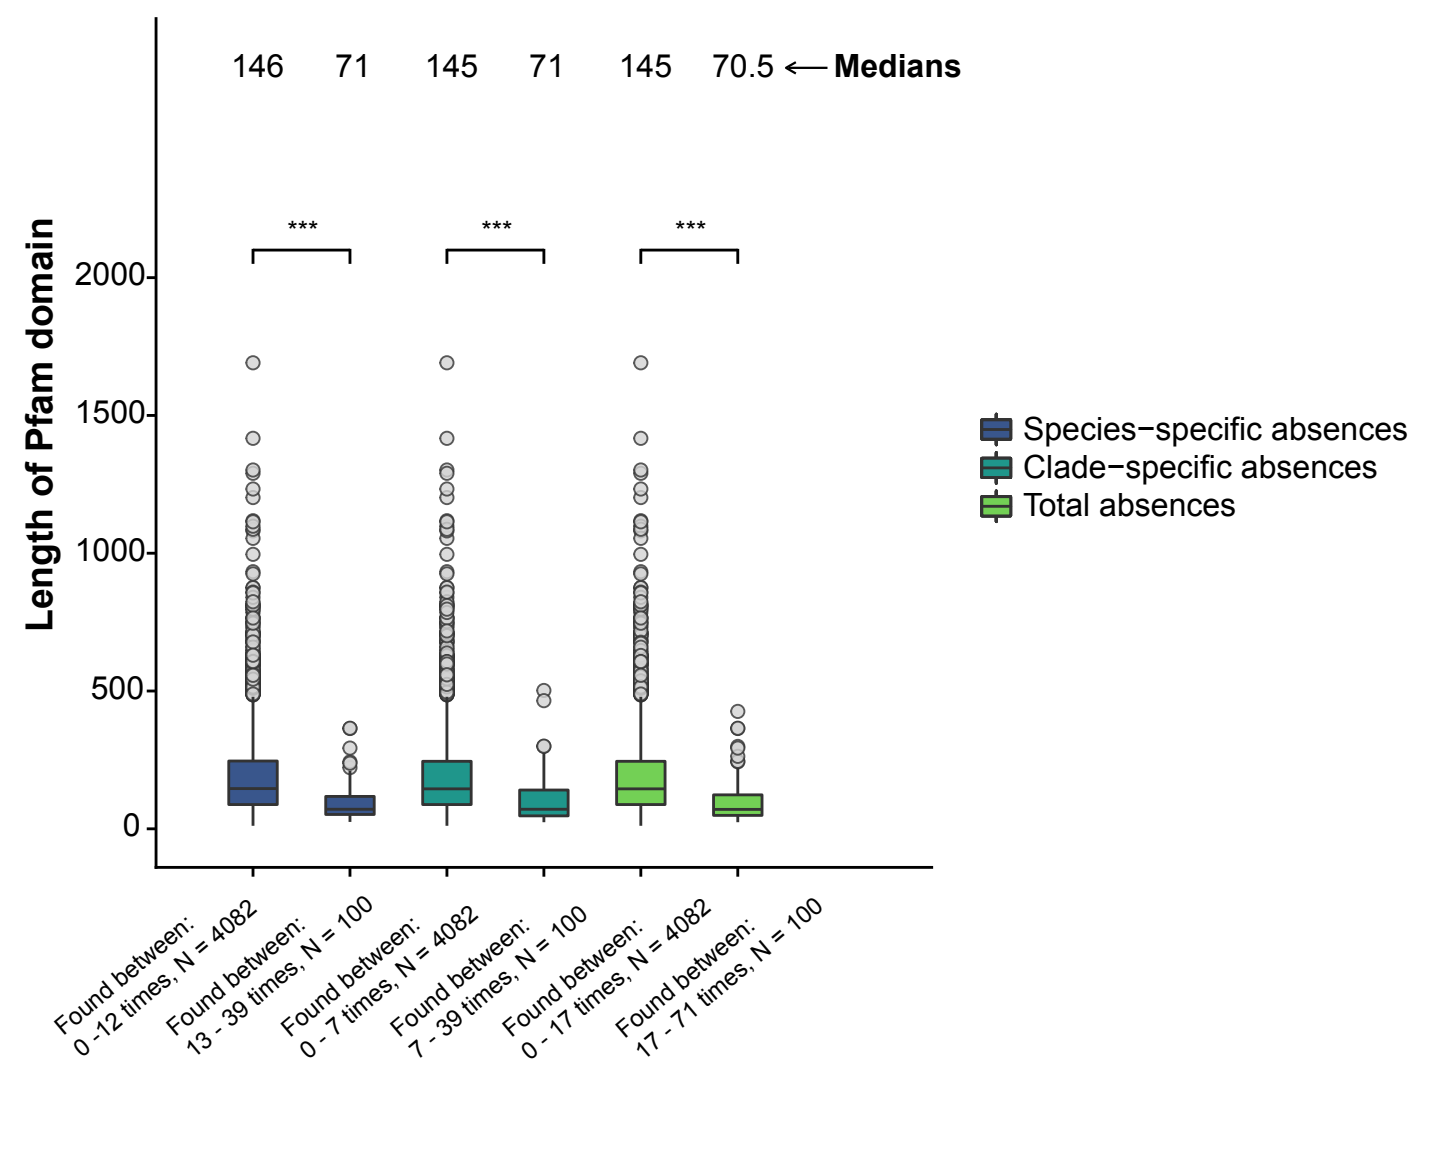

Supplement: pcbi.1007301.s007.pdf [file pcbi.1007301.s007.pdf]
