# Supplementary material for: Measuring the impact of gene prediction on gene loss estimates in Eukaryotes by quantifying falsely inferred absences
Source: PubMed Central journal article supplement (PMC6736253; doi:10.1371/journal.pcbi.1007301), 2019-08-28

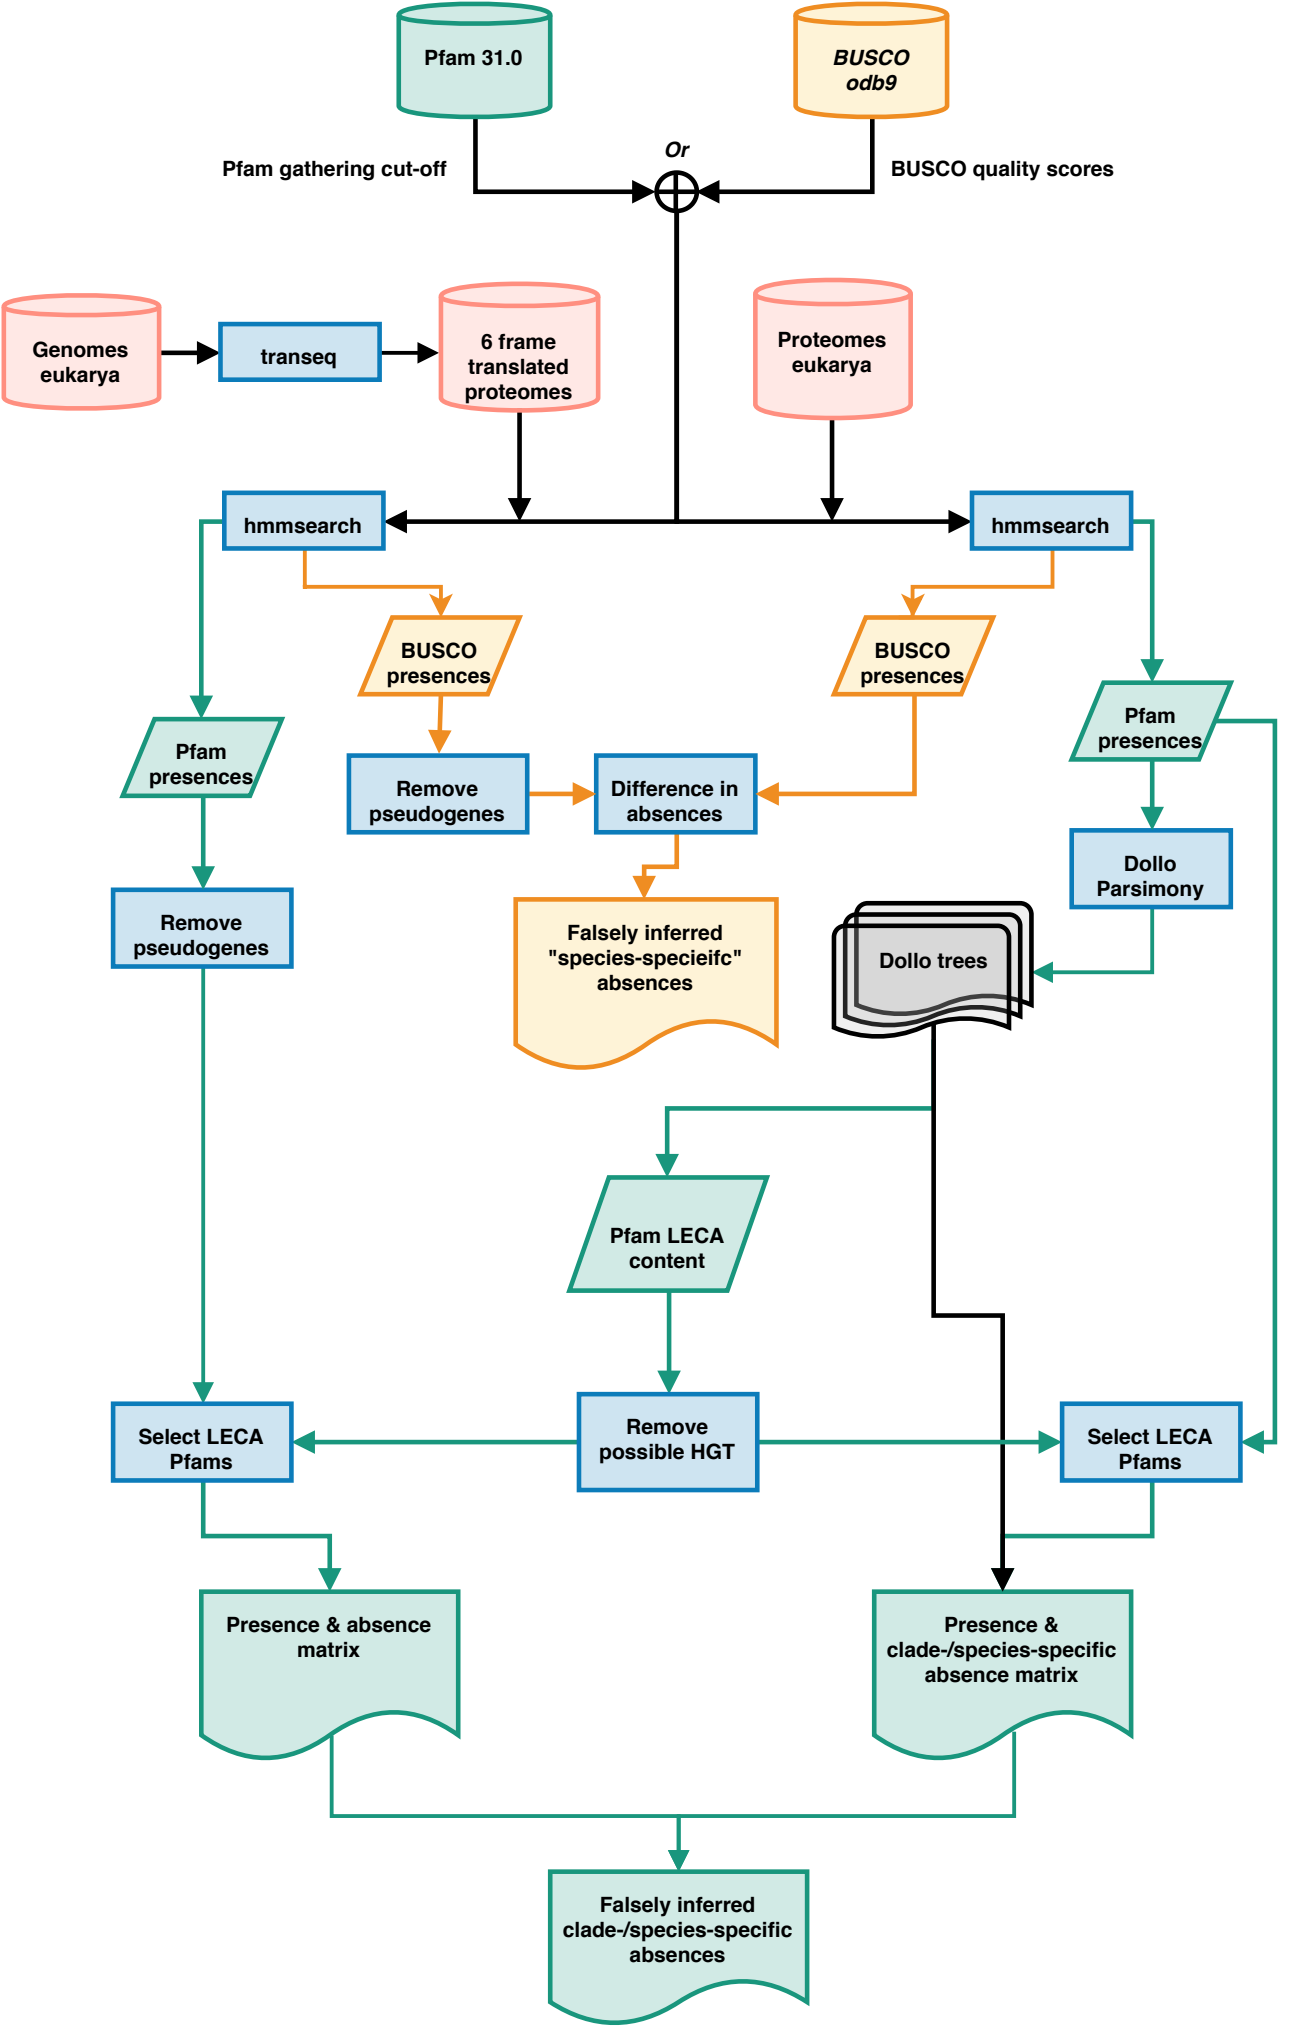

Supplement: pcbi.1007301.s008.pdf [file pcbi.1007301.s008.pdf]
