# Supplementary material for: Measuring the impact of gene prediction on gene loss estimates in Eukaryotes by quantifying falsely inferred absences
Source: PubMed Central journal article supplement (PMC6736253; doi:10.1371/journal.pcbi.1007301), 2019-08-28
Supplement: pcbi.1007301.s011.pdf [file pcbi.1007301.s011.pdf]

| <b>Supergroups</b> | <b>Resources</b>                                                                                                                                                                                                                                                                                                                                                                                                                                                                                                                                                                                                                                                                                                                                                                                                                                                                                                                                                                                                                                                                                                                                                                                                                                                                                                                                                                                                                                                                                                                                                                                                                                                                                                                                                                                                                                                                                                                                                                                                                                                                                                                                                                                                                                                                                                                                                                                                                                                                                                                                                                                                                                                                                                                                                                                                                                                                                                                                                                                                                                                                           |
|--------------------|--------------------------------------------------------------------------------------------------------------------------------------------------------------------------------------------------------------------------------------------------------------------------------------------------------------------------------------------------------------------------------------------------------------------------------------------------------------------------------------------------------------------------------------------------------------------------------------------------------------------------------------------------------------------------------------------------------------------------------------------------------------------------------------------------------------------------------------------------------------------------------------------------------------------------------------------------------------------------------------------------------------------------------------------------------------------------------------------------------------------------------------------------------------------------------------------------------------------------------------------------------------------------------------------------------------------------------------------------------------------------------------------------------------------------------------------------------------------------------------------------------------------------------------------------------------------------------------------------------------------------------------------------------------------------------------------------------------------------------------------------------------------------------------------------------------------------------------------------------------------------------------------------------------------------------------------------------------------------------------------------------------------------------------------------------------------------------------------------------------------------------------------------------------------------------------------------------------------------------------------------------------------------------------------------------------------------------------------------------------------------------------------------------------------------------------------------------------------------------------------------------------------------------------------------------------------------------------------------------------------------------------------------------------------------------------------------------------------------------------------------------------------------------------------------------------------------------------------------------------------------------------------------------------------------------------------------------------------------------------------------------------------------------------------------------------------------------------------|
| Eukaryota          | <a href="http://www.pnas.org/content/112/7/E693.full">http://www.pnas.org/content/112/7/E693.full</a><br><a href="http://rspb.royalsocietypublishing.org/content/283/1823/20152802.long?trendmd-shared=0">http://rspb.royalsocietypublishing.org/content/283/1823/20152802.long?trendmd-shared=0</a> (contains 'Centrohelida' and MMETSP data)                                                                                                                                                                                                                                                                                                                                                                                                                                                                                                                                                                                                                                                                                                                                                                                                                                                                                                                                                                                                                                                                                                                                                                                                                                                                                                                                                                                                                                                                                                                                                                                                                                                                                                                                                                                                                                                                                                                                                                                                                                                                                                                                                                                                                                                                                                                                                                                                                                                                                                                                                                                                                                                                                                                                             |
| Opisthokonta       | <a href="http://www.sciencedirect.com/science/article/pii/S0960982215008878">http://www.sciencedirect.com/science/article/pii/S0960982215008878</a><br><a href="http://www.sciencedirect.com/science/article/pii/S1055790314002796">http://www.sciencedirect.com/science/article/pii/S1055790314002796</a><br><a href="http://www.sciencedirect.com/science/article/pii/S0960982217301999">http://www.sciencedirect.com/science/article/pii/S0960982217301999</a><br><a href="http://www.pnas.org/content/112/48/14912.full">http://www.pnas.org/content/112/48/14912.full</a><br><a href="https://elifesciences.org/content/4/e05503">https://elifesciences.org/content/4/e05503</a><br><a href="http://www.nature.com/nature/journal/v477/n7365/full/nature10382.html">http://www.nature.com/nature/journal/v477/n7365/full/nature10382.html</a><br><a href="http://rspb.royalsocietypublishing.org/content/276/1660/1245">http://rspb.royalsocietypublishing.org/content/276/1660/1245</a><br><a href="http://www.sciencedirect.com/science/article/pii/S0960982215007952">http://www.sciencedirect.com/science/article/pii/S0960982215007952</a><br><a href="http://www.sciencedirect.com/science/article/pii/S0960982213000298">http://www.sciencedirect.com/science/article/pii/S0960982213000298</a><br><a href="https://www.nature.com/ng/journal/v36/n12/full/ng1472.html">https://www.nature.com/ng/journal/v36/n12/full/ng1472.html</a><br><a href="http://science.sciencemag.org/content/346/6210/763.full">http://science.sciencemag.org/content/346/6210/763.full</a><br><a href="https://bmcevolbiol.biomedcentral.com/articles/10.1186/1471-2148-13-5">https://bmcevolbiol.biomedcentral.com/articles/10.1186/1471-2148-13-5</a><br><a href="http://www.ingentaconnect.com/content/ima/imafung/2010/00000001/00000002/art00020">http://www.ingentaconnect.com/content/ima/imafung/2010/00000001/00000002/art00020</a><br><a href="http://www.ingentaconnect.com/content/nhn/pimj/2013/00000030/00000001/art00008">http://www.ingentaconnect.com/content/nhn/pimj/2013/00000030/00000001/art00008</a><br><a href="http://www.umich.edu/~mycology/resources/Publications/Spatafora.Mycologia.2016.pdf">http://www.umich.edu/~mycology/resources/Publications/Spatafora.Mycologia.2016.pdf</a><br><a href="http://jcm.asm.org/content/50/1/66.abstract">http://jcm.asm.org/content/50/1/66.abstract</a><br><a href="https://academic.oup.com/mbe/article/26/1/27/972479/Phylogenomic-Analyses-Support-the-Monophyly-of#77767571">https://academic.oup.com/mbe/article/26/1/27/972479/Phylogenomic-Analyses-Support-the-Monophyly-of#77767571</a><br><a href="http://www.sciencedirect.com/science/article/pii/S143446101200079X">http://www.sciencedirect.com/science/article/pii/S143446101200079X</a><br><a href="http://www.nature.com/nature/journal/v443/n7113/full/nature05110.html">http://www.nature.com/nature/journal/v443/n7113/full/nature05110.html</a><br><a href="https://www.nature.com/articles/ncomms5471#">https://www.nature.com/articles/ncomms5471#</a> |
| Amoebozoa          | <a href="http://www.sciencedirect.com/science/article/pii/S1055790314002784">http://www.sciencedirect.com/science/article/pii/S1055790314002784</a><br><a href="http://www.sciencedirect.com/science/article/pii/S105579031630015X">http://www.sciencedirect.com/science/article/pii/S105579031630015X</a><br><a href="http://www.sciencedirect.com/science/article/pii/S1434461012000922">http://www.sciencedirect.com/science/article/pii/S1434461012000922</a><br><a href="http://www.sciencedirect.com/science/article/pii/S1055790314002796">http://www.sciencedirect.com/science/article/pii/S1055790314002796</a><br><a href="http://www.sciencedirect.com/science/article/pii/S1055790315001608">http://www.sciencedirect.com/science/article/pii/S1055790315001608</a><br><a href="https://bmcgenomics.biomedcentral.com/articles/10.1186/s12864-015-1278-x">https://bmcgenomics.biomedcentral.com/articles/10.1186/s12864-015-1278-x</a><br><a href="https://academic.oup.com/mbe/article/doi/10.1093/molbev/msx162/3827454/Between-a-Pod-and-a-Hard-Test-The-Deep-Evolution">https://academic.oup.com/mbe/article/doi/10.1093/molbev/msx162/3827454/Between-a-Pod-and-a-Hard-Test-The-Deep-Evolution</a>                                                                                                                                                                                                                                                                                                                                                                                                                                                                                                                                                                                                                                                                                                                                                                                                                                                                                                                                                                                                                                                                                                                                                                                                                                                                                                                                                                                                                                                                                                                                                                                                                                                                                                                                                                                                                                                                        |
| Archaeplastida     | <a href="http://currents.plos.org/treeoflife/article/red-algal-phylogenomics-provides-a-robust-framework-for-inferring-evolution-of-key-metabolic-pathways/">http://currents.plos.org/treeoflife/article/red-algal-phylogenomics-provides-a-robust-framework-for-inferring-evolution-of-key-metabolic-pathways/</a><br><a href="http://currents.plos.org/treeoflife/article/red-algal-phylogenomics-provides-a-">http://currents.plos.org/treeoflife/article/red-algal-phylogenomics-provides-a-</a>                                                                                                                                                                                                                                                                                                                                                                                                                                                                                                                                                                                                                                                                                                                                                                                                                                                                                                                                                                                                                                                                                                                                                                                                                                                                                                                                                                                                                                                                                                                                                                                                                                                                                                                                                                                                                                                                                                                                                                                                                                                                                                                                                                                                                                                                                                                                                                                                                                                                                                                                                                                       |

|             |                                                                                                                                                                                                                                                                                                                                                                                                                                                                                                                                                                                                                                                                                                                                                                                                                                                                                                                                                                                                                                                                                                                                                                                                                                                                                                                                                                                                                                                                                                                                                                                                                                                                                              |
|-------------|----------------------------------------------------------------------------------------------------------------------------------------------------------------------------------------------------------------------------------------------------------------------------------------------------------------------------------------------------------------------------------------------------------------------------------------------------------------------------------------------------------------------------------------------------------------------------------------------------------------------------------------------------------------------------------------------------------------------------------------------------------------------------------------------------------------------------------------------------------------------------------------------------------------------------------------------------------------------------------------------------------------------------------------------------------------------------------------------------------------------------------------------------------------------------------------------------------------------------------------------------------------------------------------------------------------------------------------------------------------------------------------------------------------------------------------------------------------------------------------------------------------------------------------------------------------------------------------------------------------------------------------------------------------------------------------------|
|             | <a href="#">robust-framework-for-inferring-evolution-of-key-metabolic-pathways/</a><br><a href="http://www.pnas.org/content/111/45/E4859.full">http://www.pnas.org/content/111/45/E4859.full</a><br><a href="http://www.sciencedirect.com/science/article/pii/S0960982210014600">http://www.sciencedirect.com/science/article/pii/S0960982210014600</a><br><a href="http://rstb.royalsocietypublishing.org/content/372/1713/20150509">http://rstb.royalsocietypublishing.org/content/372/1713/20150509</a><br><a href="http://www.tandfonline.com/doi/full/10.1080/07352689.2011.615705?scroll=top&amp;needAccess=true">http://www.tandfonline.com/doi/full/10.1080/07352689.2011.615705?scroll=top&amp;needAccess=true</a>                                                                                                                                                                                                                                                                                                                                                                                                                                                                                                                                                                                                                                                                                                                                                                                                                                                                                                                                                                  |
| SAR         | <a href="http://mbe.oxfordjournals.org/content/33/11/2890.full">http://mbe.oxfordjournals.org/content/33/11/2890.full</a><br><a href="http://mbe.oxfordjournals.org/content/33/4/980.full">http://mbe.oxfordjournals.org/content/33/4/980.full</a><br><a href="http://www.sciencedirect.com/science/article/pii/S1055790316300677">http://www.sciencedirect.com/science/article/pii/S1055790316300677</a><br><a href="http://msphere.asm.org/content/2/2/e00095-17">http://msphere.asm.org/content/2/2/e00095-17</a><br><a href="http://tolweb.org/Apicomplexa">http://tolweb.org/Apicomplexa</a><br><a href="http://www.pnas.org/content/114/2/E171.full">http://www.pnas.org/content/114/2/E171.full</a> (mainly dinoflagellates)<br><a href="https://www.ncbi.nlm.nih.gov/pubmed/28417959">https://www.ncbi.nlm.nih.gov/pubmed/28417959</a><br><a href="https://bmcgenomics.biomedcentral.com/articles/10.1186/s12864-015-1904-7">https://bmcgenomics.biomedcentral.com/articles/10.1186/s12864-015-1904-7</a><br><a href="https://www.ncbi.nlm.nih.gov/pmc/articles/PMC5394536/">https://www.ncbi.nlm.nih.gov/pmc/articles/PMC5394536/</a><br><a href="https://www.nature.com/articles/srep36089">https://www.nature.com/articles/srep36089</a><br><a href="https://www.nature.com/articles/srep24874?WT.feed_name=subjects_taxonomy">https://www.nature.com/articles/srep24874?WT.feed_name=subjects_taxonomy</a><br><a href="http://aem.asm.org/content/74/3/883.full">http://aem.asm.org/content/74/3/883.full</a><br><a href="http://onlinelibrary.wiley.com/doi/10.1111/j.1550-7408.2008.00379.x/full">http://onlinelibrary.wiley.com/doi/10.1111/j.1550-7408.2008.00379.x/full</a> |
| Excavata    | <a href="http://www.pnas.org/content/106/10/3859.full">http://www.pnas.org/content/106/10/3859.full</a><br><a href="http://www.scielo.br/scielo.php?pid=S0074-02762016001200765&amp;script=sci_arttext">http://www.scielo.br/scielo.php?pid=S0074-02762016001200765&amp;script=sci_arttext</a><br><a href="https://www.ncbi.nlm.nih.gov/pmc/articles/PMC4870792/">https://www.ncbi.nlm.nih.gov/pmc/articles/PMC4870792/</a>                                                                                                                                                                                                                                                                                                                                                                                                                                                                                                                                                                                                                                                                                                                                                                                                                                                                                                                                                                                                                                                                                                                                                                                                                                                                  |
| Cryptophyta | <a href="http://rspb.royalsocietypublishing.org/content/early/2012/01/31/rspb.2011.2301">http://rspb.royalsocietypublishing.org/content/early/2012/01/31/rspb.2011.2301</a><br><a href="http://rspb.royalsocietypublishing.org/content/283/1823/20152802">http://rspb.royalsocietypublishing.org/content/283/1823/20152802</a>                                                                                                                                                                                                                                                                                                                                                                                                                                                                                                                                                                                                                                                                                                                                                                                                                                                                                                                                                                                                                                                                                                                                                                                                                                                                                                                                                               |
| Haptophyta  | <a href="http://www.sciencedirect.com/science/article/pii/S187477871500029X">http://www.sciencedirect.com/science/article/pii/S187477871500029X</a><br><a href="http://www.nature.com/nature/journal/v499/n7457/full/nature12221.html">http://www.nature.com/nature/journal/v499/n7457/full/nature12221.html</a>                                                                                                                                                                                                                                                                                                                                                                                                                                                                                                                                                                                                                                                                                                                                                                                                                                                                                                                                                                                                                                                                                                                                                                                                                                                                                                                                                                             |
